# Supplementary material for: Cytotoxicity and Antibiofilm Activity of Silver-Polypropylene Nanocomposites
Source: MDPI journal article supplement (doi:10.3390/antibiotics12050924), 2023-05-17
Supplement: s1 [file s1]

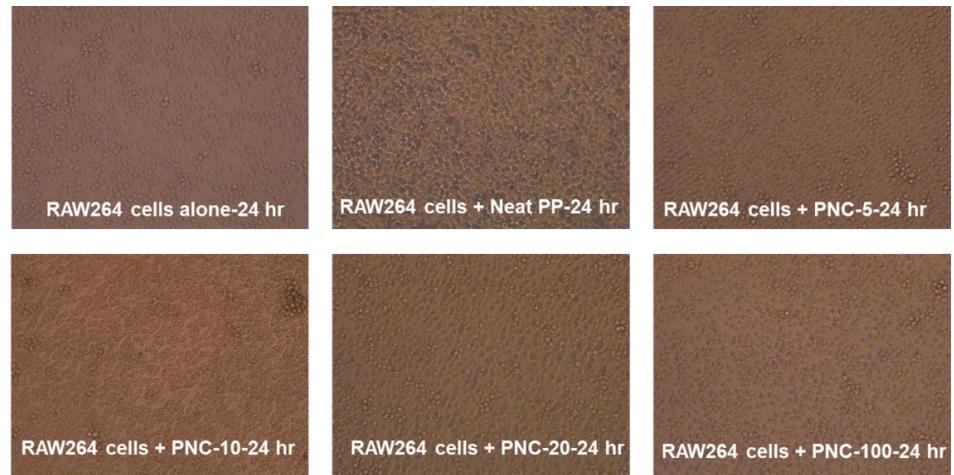

**Figure S1.** PNC effect on cell viability and cytotoxicity. Murine RAW264 cells ( $1 \times 10^6$  cell/ml) were exposed to  $0.5 \text{ cm}^2$  piece of Neat PP or PNC with increasing concentration of silver (Ag) and incubated for 24hr. RAW264 cell morphology captured with inverted bright microscopy.

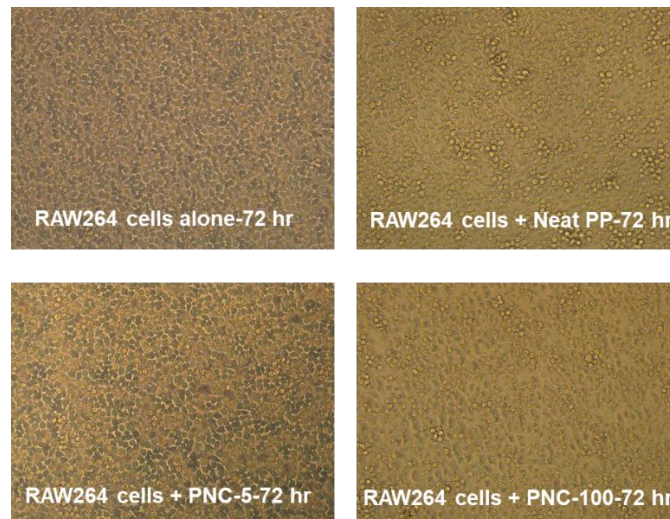

**Figure S2.** PNC effect on cell viability and cytotoxicity. Murine RAW264 cells ( $1 \times 10^6$  cell/ml) were exposed to  $0.5 \text{ cm}^2$  piece of Neat PP or PNC with increasing concentration of silver (Ag) and incubated for 72hr. RAW264 cell morphology captured with inverted bright microscopy.
